# Supplementary material for: Associations between Isolation Source, Clonal Composition, and Antibiotic Resistance Genes in Escherichia coli Collected in Washington State, USA
Source: MDPI journal article supplement (doi:10.3390/antibiotics13010103), 2024-01-20
Supplement: s1 [file s1]

(a)

Distribution of Resistance Profiles by Isolation Source  
Excluding Fully Susceptible Profiles

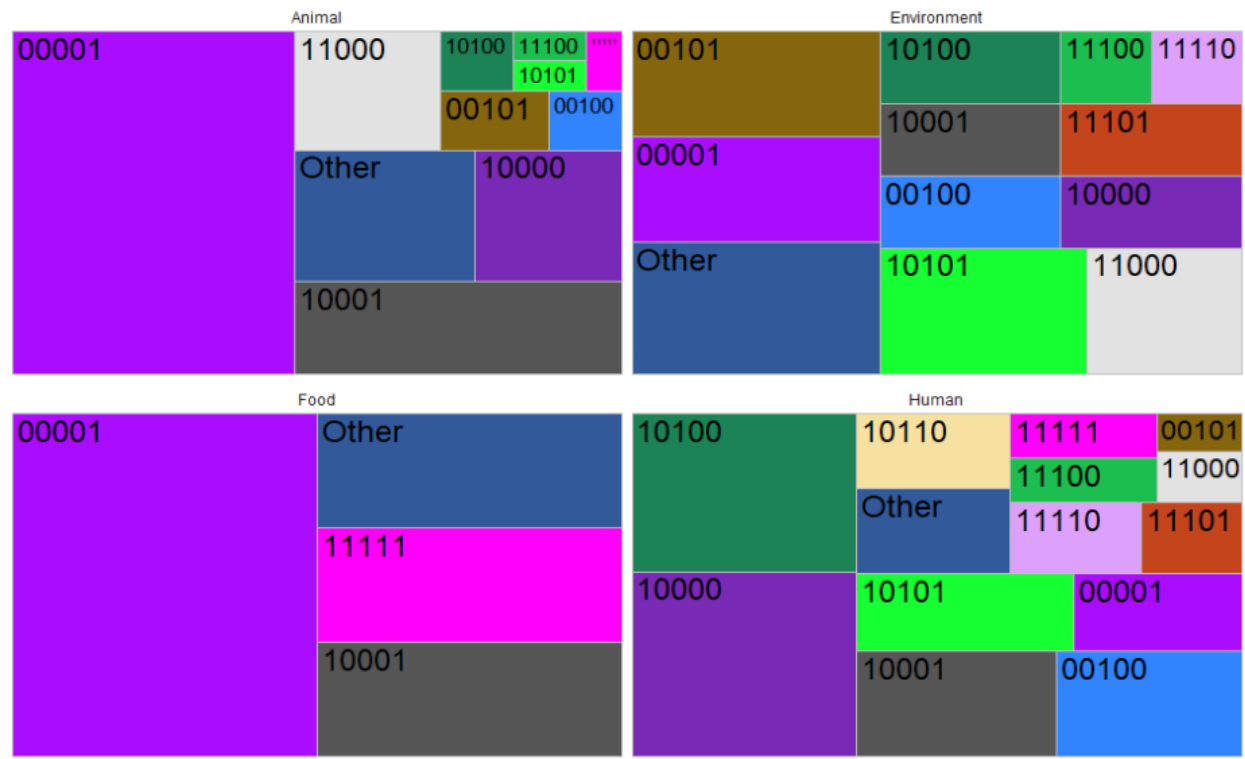

(b)

00000: No predicted resistance to any of the following: ampicillin, ceftazidime, ciprofloxacin, gentamicin, or tetracycline.

10000: Predicted resistance to ampicillin only.

01000: Predicted resistance to ceftazidime only.

00100: Predicted resistance to ciprofloxacin only.

00010: Predicted resistance to gentamicin only.

00001: Predicted resistance to tetracycline only.

11000: Predicted resistance to ampicillin and ceftazidime.

10100: Predicted resistance to ampicillin and ciprofloxacin.

10010: Predicted resistance to ampicillin and gentamicin.

10001: Predicted resistance to ampicillin and tetracycline.

01100: Predicted resistance to ceftazidime and ciprofloxacin.

01010: Predicted resistance to ceftazidime and gentamicin.

01001: Predicted resistance to ceftazidime and tetracycline.

00110: Predicted resistance to ciprofloxacin and gentamicin.

00101: Predicted resistance to ciprofloxacin and tetracycline.

00011: Predicted resistance to gentamicin and tetracycline.

11100: Predicted resistance to ampicillin, ceftazidime, and ciprofloxacin.

11010: Predicted resistance to ampicillin, ceftazidime, and gentamicin.

11001: Predicted resistance to ampicillin, ceftazidime, and tetracycline.

10110: Predicted resistance to ampicillin, ciprofloxacin, and gentamicin.  
 10101: Predicted resistance to ampicillin, ciprofloxacin, and tetracycline.  
 10011: Predicted resistance to ampicillin, gentamicin, and tetracycline.  
 01110: Predicted resistance to ceftazidime, ciprofloxacin, and gentamicin.  
 01101: Predicted resistance to ceftazidime, ciprofloxacin, and tetracycline.  
 01011: Predicted resistance to ceftazidime, gentamicin, and tetracycline.  
 00111: Predicted resistance to ciprofloxacin, gentamicin, and tetracycline.  
 11110: Predicted resistance to ampicillin, ceftazidime, ciprofloxacin, and gentamicin.  
 11101: Predicted resistance to ampicillin, ceftazidime, ciprofloxacin, and tetracycline.  
 11011: Predicted resistance to ampicillin, ceftazidime, gentamicin, and tetracycline.  
 10111: Predicted resistance to ampicillin, ciprofloxacin, gentamicin, and tetracycline.  
 01111: Predicted resistance to ceftazidime, ciprofloxacin, gentamicin, and tetracycline.  
 11111: Predicted resistance to all five of the following antibiotics: ampicillin, ceftazidime, ciprofloxacin, gentamicin, or tetracycline..

**Figure S1:** (a) Distribution of resistance profiles by isolation source, excluding fully susceptible profiles (profile 00000). (b) Definitions of resistance profiles in terms of predicted resistance.

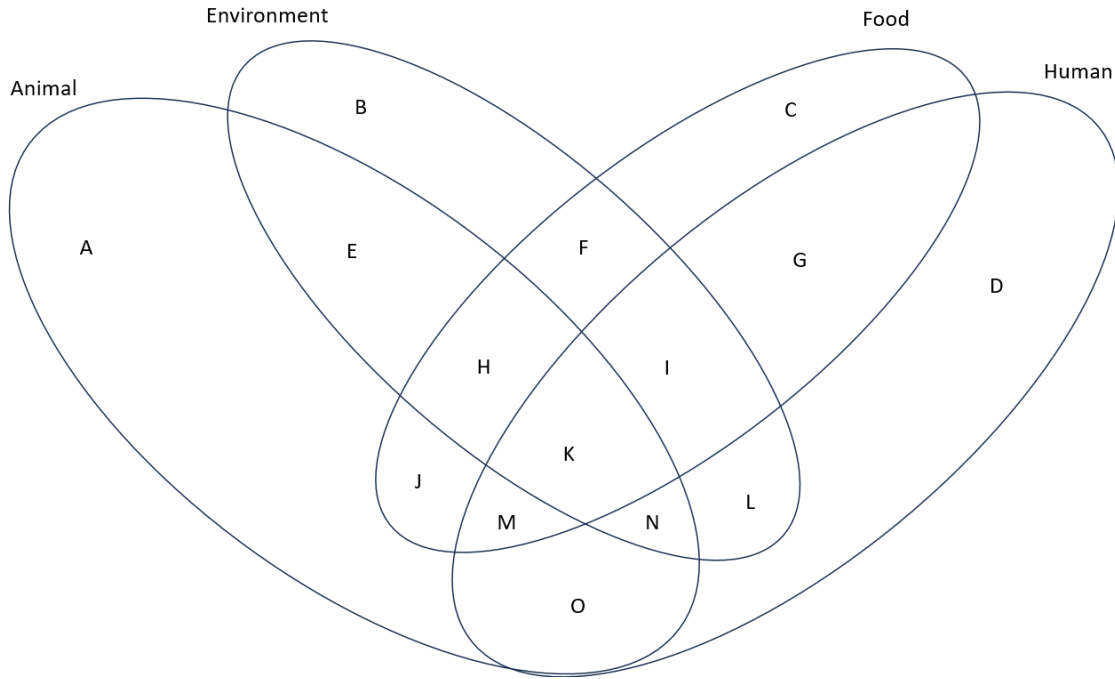

- A. **Animal:** *aadA10*, *aadA24*, *aadA7*, *bla<sub>CTX-M-1</sub>*
- B. **Environment:** *bla<sub>DHA-1</sub>*, *bla<sub>SHV-2a</sub>*, *lnu(F)*, *qepA4*, *qnrB4*, *qnrB67*
- C. **Food:** *aadA22*, *bla<sub>NDM-5</sub>*, *bla<sub>TEM-1D</sub>*, *fosB1*
- D. **Human:** *aac(3)-IIId*, *aac(6)-Ib-cr*, *aac(6)-Ib11*, *aadA16*, *aph(3)-IIa*, *aph(6)-Ic*, *ARR-3*, *bla<sub>CARB-2</sub>*, *bla<sub>CTX-M-14</sub>*, *bla<sub>CTX-M-32</sub>*, *bla<sub>CTX-M-55</sub>*, *bla<sub>KPC-2</sub>*, *bla<sub>OXA-1</sub>*, *bla<sub>OXA-2</sub>*, *bla<sub>OXA-9</sub>*, *bla<sub>TEM-102</sub>*, *bla<sub>TEM-182</sub>*, *bla<sub>TEM-6</sub>*, *dfrA8*, *dfrA10*, *dfrA14*, *dfrA16*, *dfrA19*, *dfrA27*, *dfrA36*, *ere(A)*, *erm(B)*, *fosA*, *OqxA*, *OqxB*
- E. **Animal and Environment:** *aac(2)-IIa*, *aac(3)-IV*, *aph(4)-Ia*, *bla<sub>SHV-12</sub>*
- F. **Environment and Food:** None
- G. **Food and Human:** *tet(D)*
- H. **Animal, Environment, and Food:** *floR*, *fosA7*
- I. **Environment, Food, and Human:** None
- J. **Food and Animal:** *catB3*
- K. **Animal, Environment, Food, and Human:** *aac(3)-IIa*, *aac(3)-Via*, *aadA2*, *aadA5*, *aph(3)-Ia*, *aph(3)-Ib*, *aph(6)-Id*, *dfrA12*, *dfrA17*, *mph(A)*, *sul1*, *sul2*, *tet(A)*, *tet(B)*
- L. **Environment and Human:** *bla<sub>CTX-M-15</sub>*, *cmlA1*, *qnrS1*, *sul3*
- M. **Animal, Food, and Human:** *bla<sub>TEM-1A</sub>*, *dfrA1*
- N. **Animal, Environment, and Human:** *aadA1*, *bla<sub>CMY-2</sub>*, *bla<sub>TEM-1B</sub>*, *bla<sub>TEM-1C</sub>*, *catA1*, *dfrA5*, *qnrB19*
- O. **Animal and Human:** *ant(2)-Ia*, *bla<sub>CTX-M-27</sub>*, *dfrA7*, *tet(C)*

**Figure S2** Venn diagram displaying the antibiotic resistance genes detected in isolates from animal, environment, food, and human sources.
